# Supplementary material for: Sensitivity to Injustice of Politicians and Voters
Source: Atypon-hosted journal article supplement (doi:10.1027/1864-9335/a000459), 2021-11-01
Supplement: 1864-9335_a000459_esm1.pdf [file 1864-9335_a000459_esm1.pdf]

**Electronic Supplementary Material 1**

**Sample Analyses and Scale Documentation for:**

**Sensitivity to Injustice of Politicians and Voters**

**Table E.1**

*Representativity analysis with regard to the target (n = 1000) vs. the actual voter sample (n = 998)*

| Demographic information       | Target frequencies<br>(absolute) | Target frequencies<br>(relative in %) | Actual frequencies<br>(absolute) | Actual frequencies<br>(relative in %) |
|-------------------------------|----------------------------------|---------------------------------------|----------------------------------|---------------------------------------|
| <b>Age groups (in years)</b>  |                                  |                                       |                                  |                                       |
| 18–20                         | 42                               | 4                                     | -                                | -                                     |
| 21–30                         | 154                              | 15                                    | 160                              | 16                                    |
| 31–40                         | 154                              | 15                                    | 170                              | 17                                    |
| 41–50                         | 214                              | 21                                    | 228                              | 23                                    |
| 51–60                         | 176                              | 18                                    | 262                              | 26                                    |
| 61–70                         | 140                              | 14                                    | 178                              | 18                                    |
| 71–80                         | 118                              | 12                                    | -                                | -                                     |
| <b>Gender</b>                 |                                  |                                       |                                  |                                       |
| Female                        | 504                              | 51                                    | 442                              | 44                                    |
| Male                          | 496                              | 50                                    | 556                              | 56                                    |
| <b>German federal state</b>   |                                  |                                       |                                  |                                       |
| Baden-Wuerttemberg            | 131                              | 13                                    | 116                              | 12                                    |
| Bavaria                       | 153                              | 15                                    | 146                              | 15                                    |
| Berlin                        | 42                               | 4                                     | 45                               | 5                                     |
| Brandenburg                   | 31                               | 3                                     | 27                               | 3                                     |
| Bremen                        | 8                                | 1                                     | 20                               | 2                                     |
| Hamburg                       | 22                               | 2                                     | 21                               | 2                                     |
| Hesse                         | 74                               | 7                                     | 69                               | 7                                     |
| Mecklenburg-West<br>Pomerania | 20                               | 2                                     | 24                               | 2                                     |
| Lower Saxony                  | 97                               | 10                                    | 90                               | 9                                     |
| North Rhine-<br>Westphalia    | 219                              | 22                                    | 232                              | 23                                    |
| Rhineland-Palatinate          | 49                               | 5                                     | 43                               | 4                                     |
| Saarland                      | 13                               | 1                                     | 14                               | 1                                     |
| Saxony                        | 51                               | 5                                     | 56                               | 6                                     |
| Saxony-Anhalt                 | 29                               | 3                                     | 28                               | 3                                     |
| Schleswig-Holstein            | 35                               | 4                                     | 39                               | 4                                     |
| Thuringia                     | 28                               | 3                                     | 28                               | 3                                     |

*Note.* Sum of the absolute frequencies over the target age groups was  $n = 998$  due to the sample calculation of respondi AG.

**Figure E.1**

*Sensitivity (a) and post-hoc power (b) analysis with the sample sizes for analyses*

(a) Sensitivity power analysis

[3] -- Wednesday, October 28, 2020 -- 08:19:10

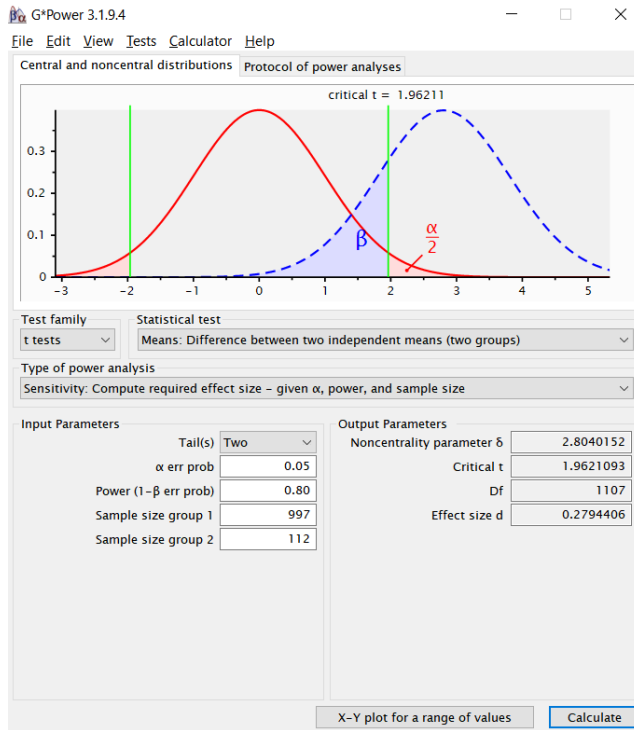

**t tests** - Means: Difference between two independent means (two groups)

**Analysis:** Sensitivity: Compute required effect size

**Input:** Tail(s) = Two  
 $\alpha$  err prob = 0.05  
 Power (1- $\beta$  err prob) = 0.80  
 Sample size group 1 = 997  
 Sample size group 2 = 112

**Output:** Noncentrality parameter  $\delta$  = 2.8040152  
 Critical t = 1.9621093  
 Df = 1107  
 Effect size d = 0.2794406

(b) Post-hoc power analysis

G\*Power protocols

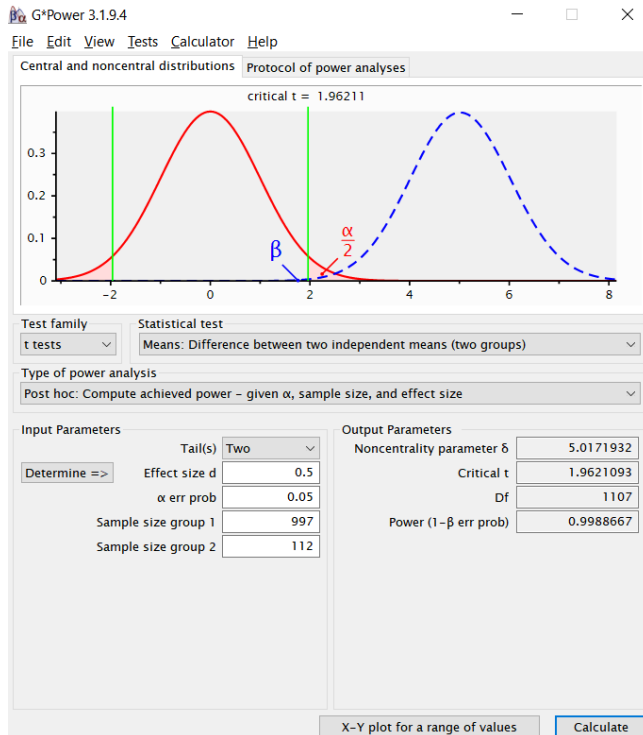

[2] -- Wednesday, October 28, 2020 -- 08:14:15

t tests - Means: Difference between two independent means (two groups)

Analysis: Post hoc: Compute achieved power

Input: Tail(s) = Two

Effect size  $d = 0.5$

$\alpha$  err prob = 0.05

Sample size group 1 = 997

Sample size group 2 = 112

Output: Noncentrality parameter  $\delta = 5.0171932$

Critical  $t = 1.9621093$

Df = 1107

Power (1- $\beta$  err prob) = 0.9988667

## Background Variables

**Table E.2**

*Gender distribution citizen*

| Gender           | Absolute frequency |
|------------------|--------------------|
| Males            | 556                |
| Females          | 442                |
| <i>N (total)</i> | 998                |

**Table E.3**

*Gender distribution politicians*

| Gender           | Absolute frequency |
|------------------|--------------------|
| Males            | 65                 |
| Females          | 51                 |
| <i>N (total)</i> | 116                |

**Table E.4**

*Party affiliations*

| Party                | Absolute frequency |
|----------------------|--------------------|
| CDU                  | 27                 |
| CSU                  | 7                  |
| SPD                  | 51                 |
| Bündnis90/Die Grünen | 9                  |
| DIE LINKE            | 22                 |
| <i>N (total)</i>     | 116                |

**Table E.5**

*Party affiliation duration*

| Years            | Absolute frequency |
|------------------|--------------------|
| 0-10             | 14                 |
| 11-20            | 28                 |
| 21-30            | 41                 |
| 31-40            | 21                 |
| 41-50            | 11                 |
| <i>N (total)</i> | 116                |

**Table E.6**

*Duration of membership in the German National Parliament*

| Years            | Absolute frequency |
|------------------|--------------------|
| 0-4              | 46                 |
| 5-8              | 28                 |
| 9-12             | 24                 |
| 13-16            | 11                 |
| 17-20            | 3                  |
| 21-24            | 2                  |
| 25-28            | 1                  |
| 29-32            | 1                  |
| <i>N (total)</i> | 116                |

**Table E.7**  
*Highest federal office*

| Federal office                                        | Absolute frequency |
|-------------------------------------------------------|--------------------|
| Federal minister                                      | 2                  |
| Parliamentary Secretary of State                      | 4                  |
| Vice-chairman of the parliamentary group              | 6                  |
| Member of the parliamentary group executive committee | 8                  |
| Chairman of a National Parliament committee           | 5                  |
| Vice-Chairman of a National Parliament committee      | 4                  |
| Spokesman of a National Parliament committee          | 15                 |
| Spokesman of the parliamentary group                  | 8                  |
| Deputy spokesman of the parliamentary group           | 4                  |
| Rapporteur in a National Parliament committee         | 16                 |
| No federal office                                     | 44                 |
| <i>N (total)</i>                                      | 116                |

**Table E.8**  
*Economic state "self"*

| Party            | Absolute frequency |
|------------------|--------------------|
| Very good        | 49                 |
| Good             | 369                |
| Partly/partly    | 368                |
| Bad              | 164                |
| Very bad         | 48                 |
| <i>N (total)</i> | 998                |

**Table E.9**  
*Economic state "Germany"*

| Party            | Absolute frequency |
|------------------|--------------------|
| Very good        | 57                 |
| Good             | 419                |
| Partly/partly    | 414                |
| Bad              | 84                 |
| Very bad         | 24                 |
| <i>N (total)</i> | 998                |

**Scales**

**Table E.10**  
General belief in a just world

| Item label       | <i>M</i> | <i>SD</i> | Item scale intercorrelation |
|------------------|----------|-----------|-----------------------------|
| Test_1_2         | 2.26     | 1.30      | 0.63                        |
| Test_1_4         | 1.94     | 1.44      | 0.70                        |
| Test_1_5         | 2.46     | 1.23      | 0.72                        |
| Test_1_7         | 2.26     | 1.31      | 0.80                        |
| Test_1_8         | 2.22     | 1.39      | 0.69                        |
| <i>M</i> total   | 2.2      |           |                             |
| <i>SD</i> total  | 1        |           |                             |
| McDonald's omega | 0.86     |           |                             |
| Cronbach's alpha | 0.84     |           |                             |

**Table E.11**  
General belief in a just world

| Item label | Item                                                                                                                          |
|------------|-------------------------------------------------------------------------------------------------------------------------------|
| Test_1_2   | The scales of justice may swing sometimes to this side, sometimes to that side, but ultimately everything balances out again. |
| Test_1_4   | In the end, you get in life what you deserve.                                                                                 |
| Test_1_5   | In life, there are always events that restore justice.                                                                        |
| Test_1_7   | Despite all the injustices, in the end most people get what they deserve.                                                     |
| Test_1_8   | Those who live decently can be confident that justice will be done to them for it.]                                           |

**Table E.12**  
General belief in an unjust world

| Item label       | <i>M</i> | <i>SD</i> | Item scale intercorrelation |
|------------------|----------|-----------|-----------------------------|
| Test_1_1         | 3.48     | 1.11      | 0.61                        |
| Test_1_3         | 3.69     | 1.21      | 0.52                        |
| Test_1_6         | 3.59     | 1.30      | 0.46                        |
| Test_1_13        | 2.93     | 1.46      | 0.40                        |
| <i>M</i> total   | 3.4      |           |                             |
| <i>SD</i> total  | 0.85     |           |                             |
| McDonald's omega | 0.64     |           |                             |
| Cronbach's alpha | 0.60     |           |                             |

**Table E.13**  
General belief in an unjust world

| Item label | Item                                                                 |
|------------|----------------------------------------------------------------------|
| Test_1_1   | A lot of people suffer an unjust fate.                               |
| Test_1_3   | Everyone has to expect that one day an unjust fate will befall them. |
| Test_1_6   | You cannot rely on justice in life.                                  |
| Test_1_13  | Often, it is those who least deserve it who get sick.                |

**Table E.14**

*Belief in an immanent justice*

| Item label       | <i>M</i> | <i>SD</i> | Item scale intercorrelation |
|------------------|----------|-----------|-----------------------------|
| Test_1_14        | 1.48     | 1.40      | 0.74                        |
| Test_1_15        | 1.68     | 1.41      | 0.74                        |
| Test_1_16        | 1.07     | 1.31      | 0.80                        |
| Test_1_17        | 1.42     | 1.37      | 0.78                        |
| Test_1_18        | 0.90     | 1.22      | 0.73                        |
| <i>M</i> total   | 1.3      |           |                             |
| <i>SD</i> total  | 0.88     |           |                             |
| McDonald's omega | 0.90     |           |                             |
| Cronbach's alpha | 0.88     |           |                             |

**Table E.15**

*Belief in an immanent justice*

| Item label | Item                                                         |
|------------|--------------------------------------------------------------|
| Test_1_14  | Serious illnesses are often the punishment for a lifestyle.  |
| Test_1_15  | A bad life is often followed by illness.                     |
| Test_1_16  | Hardly anyone becomes seriously ill completely undeservedly. |
| Test_1_17  | Many sick people have brought their lives on themselves.     |
| Test_1_18  | A truly good person rarely becomes seriously ill.            |

**Table E.16**

*Belief in an ultimate justice*

| Item label       | <i>M</i> | <i>SD</i> | Item scale intercorrelation |
|------------------|----------|-----------|-----------------------------|
| Test_1_9         | 2.37     | 1.33      | 0.76                        |
| Test_1_10        | 2.94     | 1.35      | 0.61                        |
| Test_1_11        | 1.86     | 1.40      | 0.80                        |
| Test_1_12        | 1.67     | 1.33      | 0.78                        |
| <i>M</i> total   | 2.2      |           |                             |
| <i>SD</i> total  | 1.1      |           |                             |
| McDonald's omega | 0.64     |           |                             |
| Cronbach's alpha | 0.89     |           |                             |

**Table E.17**

*Belief in an ultimate justice*

| Item label | Item                                                                                                      |
|------------|-----------------------------------------------------------------------------------------------------------|
| Test_1_9   | Even people who suffer severe blows of fate can expect that everything will eventually balance out again. |
| Test_1_10  | Even in the worst suffering, one should not lose faith that justice will be served.                       |
| Test_1_11  | In the long run, no inequities remain even in the case of diseases.                                       |
| Test_1_12  | Even for bad diseases, there is often still fair compensation.                                            |

**Table E.18** *Sensitivity to injustice from the perspective of the victim*

| Item label | <i>M</i> | <i>SD</i> |
|------------|----------|-----------|
| Test_2_1_1 | 2.43     | 1.38      |
| Test_2_1_2 | 2.65     | 1.36      |

**Table E.19** *Sensitivity to injustice from the perspective of the victim*

| Item label | Item                                                                          |
|------------|-------------------------------------------------------------------------------|
| Test_2_1_1 | It makes me angry when others are undeservingly better off than me.           |
| Test_2_1_2 | It worries me when I have to work hard for things that come easily to others. |

**Table E.20** *Sensitivity to injustice from the perspective of the observer*

| Item label | <i>M</i> | <i>SD</i> |
|------------|----------|-----------|
| Test_2_2_1 | 3.23     | 1.19      |
| Test_2_2_2 | 2.93     | 1.23      |

**Table E.21** *Sensitivity to injustice from the perspective of the observer*

| Item label | Item                                                                              |
|------------|-----------------------------------------------------------------------------------|
| Test_2_2_1 | I am upset when someone is undeservingly worse off than others.                   |
| Test_2_2_2 | It worries me when someone has to work hard for things that come easily to others |

**Table E.22** *Sensitivity to injustice (SI) from the perspective of the beneficiary*

| Item label | <i>M</i> | <i>SD</i> |
|------------|----------|-----------|
| Test_2_3_1 | 2.09     | 1.35      |
| Test_2_3_2 | 1.99     | 1.33      |

**Table E.23** *Sensitivity to injustice from the perspective of the beneficiary*

| Item label | Item                                                                          |
|------------|-------------------------------------------------------------------------------|
| Test_2_3_1 | I feel guilty when I am better off than others for no reason.                 |
| Test_2_3_2 | It bothers me when things come easily to me that others have to work hard for |

**Table E.24** *Sensitivity to injustice from the perspective of the perpetrator*

| Item label | <i>M</i> | <i>SD</i> |
|------------|----------|-----------|
| Test_2_4_1 | 3.60     | 1.32      |
| Test_2_4_2 | 3.40     | 1.39      |

**Table E.25** *Sensitivity to injustice from the perspective of the perpetrator*

| Item label | Item                                                                                       |
|------------|--------------------------------------------------------------------------------------------|
| Test_2_4_1 | I feel guilty when I enrich myself at the cost of others.                                  |
| Test_2_4_2 | It bothers me when I use tricks to achieve something while others have to struggle for it. |



**Table E.26**

*Distributive justice according to the merit principle*

| Item label       | <i>M</i> | <i>SD</i> | Item scale intercorrelation |
|------------------|----------|-----------|-----------------------------|
| Test_3_1_1       | 1.98     | 1.19      | 0.34                        |
| Test_3_2_2       | 1.67     | 1.42      | 0.46                        |
| Test_3_3_2       | -0.66    | 1.70      | 0.34                        |
| Test_3_4_3       | 1.77     | 1.14      | 0.45                        |
| Test_3_5_1       | 1.51     | 1.37      | 0.38                        |
| Test_3_6_3       | 1.16     | 1.51      | 0.37                        |
| Test_3_7_3       | -0.32    | 1.61      | 0.43                        |
| Test_3_8_2       | -0.42    | 1.68      | 0.35                        |
| Test_3_9_2       | 1.28     | 1.40      | 0.51                        |
| Test_3_10_3      | -1.05    | 1.61      | 0.38                        |
| Test_3_11_3      | 0.55     | 1.48      | 0.49                        |
| Test_3_12_2      | 0.71     | 1.37      | 0.42                        |
| Test_3_13_1      | 0.57     | 1.43      | 0.42                        |
| <i>M</i> total   | 0.68     |           |                             |
| <i>SD</i> total  | 0.72     |           |                             |
| McDonald's omega | 0.77     |           |                             |
| Cronbach's alpha | 0.72     |           |                             |

**Table E.27**

*Distributive justice according to the merit principle*

| Item label  | Item                                                                                                                                        |
|-------------|---------------------------------------------------------------------------------------------------------------------------------------------|
| Test_3_1_1  | ... the better one would get the job.                                                                                                       |
| Test_3_2_2  | ... those who have done the least would be dismissed.                                                                                       |
| Test_3_3_2  | ... unemployment would primarily affect those with poor performance.                                                                        |
| Test_3_4_3  | ... the amount of income would be based on performance.                                                                                     |
| Test_3_5_1  | ... the amount of pension would be based on the contributions made.                                                                         |
| Test_3_6_3  | ... the children who have taken more care of their parents, would get more.                                                                 |
| Test_3_7_3  | ... that child who helped their parents the most to prepare for the holiday, would be rewarded with the window-seat.                        |
| Test_3_8_2  | ... only the best would be allowed to play.                                                                                                 |
| Test_3_9_2  | ... they would take the employee with them who was most committed to the company.                                                           |
| Test_3_10_3 | ... the quiet rooms would be given to the better students.                                                                                  |
| Test_3_11_1 | ... preference would be given to the tenants who have been very careful with their apartments.                                              |
| Test_3_12_2 | ... the one who found the apartments would get the cheaper apartment.                                                                       |
| Test_3_13_1 | ... the neighborhoods whose residents are particularly committed to providing opportunities for children to play would be considered first. |

**Table E.28**

*Distributive justice according to the principle of equality*

| Item label       | <i>M</i> | <i>SD</i> | Item scale intercorrelation |
|------------------|----------|-----------|-----------------------------|
| Test_3_1_2       | -0.04    | 1.65      | 0.48                        |
| Test_3_2_3       | 0.67     | 1.69      | 0.47                        |
| Test_3_3_3       | 0.62     | 1.71      | 0.61                        |
| Test_3_4_1       | -0.64    | 1.88      | 0.50                        |
| Test_3_5_2       | -0.26    | 1.96      | 0.45                        |
| Test_3_6_1       | 1.61     | 1.44      | 0.27                        |
| Test_3_7_1       | 2.01     | 1.30      | 0.39                        |
| Test_3_8_1       | 1.76     | 1.30      | 0.43                        |
| Test_3_9_1       | 0.54     | 1.76      | 0.39                        |
| Test_3_10_1      | 0.55     | 1.64      | 0.45                        |
| Test_3_11_3      | 0.80     | 1.41      | 0.43                        |
| Test_3_12_3      | -0.1     | 1.78      | 0.38                        |
| Test_3_13_3      | 1.06     | 1.41      | 0.49                        |
| <i>M</i> total   | 0.67     |           |                             |
| <i>SD</i> total  | 0.83     |           |                             |
| McDonald's omega | 0.80     |           |                             |
| Cronbach's alpha | 0.75     |           |                             |

**Table E.29**

*Distributive justice according to the principle of equality*

| Item label  | Item                                                                                                                            |
|-------------|---------------------------------------------------------------------------------------------------------------------------------|
| Test_3_1_2  | ... the position would be shared.                                                                                               |
| Test_3_2_3  | ... the working hours and wages would be reduced equally for all employees.                                                     |
| Test_3_3_3  | ... working hours and wages would be reduced equally so that everyone could work.                                               |
| Test_3_4_1  | ... everyone would earn the same.                                                                                               |
| Test_3_5_2  | ... the pension would be the same for everyone (standard pension).                                                              |
| Test_3_6_1  | ... all children would receive the same amount.                                                                                 |
| Test_3_7_1  | ... the children would be allowed to sit at the window alternately and for the same length of time.                             |
| Test_3_8_1  | ... all youth players would be allowed to play for the same length of time.                                                     |
| Test_3_9_1  | ... they would not take anyone with them, so that no one would be favored.                                                      |
| Test_3_10_1 | ... the occupants would change rooms regularly so that no one would be disadvantaged.                                           |
| Test_3_11_3 | ... all tenants would be considered equally, even if only minor renovations are possible.                                       |
| Test_3_12_3 | ... they would divide the rental costs in half.                                                                                 |
| Test_3_13_3 | ... the funds would be distributed in such a way that all neighborhoods would have a children's playground, albeit a small one. |

**Table E.30**

*Distributive justice according to the means-tested principle*

| Item label  | Item                                                                                                      |
|-------------|-----------------------------------------------------------------------------------------------------------|
| Test_3_1_3  | ... the person who needs the job more urgently would get it.                                              |
| Test_3_2_1  | ... those who are most in need of their jobs would be spared redundancy.                                  |
| Test_3_3_1  | ... unemployment would primarily affect those who can most easily cope with it.                           |
| Test_3_4_2  | ... the amount of income would be based on need (e.g., to provide for family members).                    |
| Test_3_5_3  | ... the amount of pension would be based on what someone needs for his livelihood.                        |
| Test_3_6_2  | ... those children would receive more who are still without their own means of existence.                 |
| Test_3_7_2  | ... the child who was flying for the first time would be allowed to sit at the window.                    |
| Test_3_8_3  | ... if primarily those who don't normally get to play much are allowed to play.                           |
| Test_3_9_3  | ... they would take with them an employee who has never been overseas.                                    |
| Test_3_10_2 | ... the quiet rooms would be given to those who are particularly affected by noise and car exhaust fumes. |
| Test_3_11_2 | ... those tenants who suffer from particularly bad living conditions would be considered first.           |
| Test_3_12_1 | ... the tenant with the lower income would get the cheaper apartment.                                     |
| Test_3_13_2 | ... the neighborhoods where children have the worst opportunities to play would be considered first.      |

**Table E.31**

*Distributive justice according to the means-tested principle*

| Item label       | <i>M</i> | <i>SD</i> | Item scale intercorrelation |
|------------------|----------|-----------|-----------------------------|
| Test_3_1_3       | 0.26     | 1.72      | 0.58                        |
| Test_3_2_1       | 1.33     | 1.54      | 0.54                        |
| Test_3_3_1       | 0.27     | 1.67      | 0.42                        |
| Test_3_4_2       | -0.19    | 1.73      | 0.60                        |
| Test_3_5_3       | -0.32    | 1.81      | 0.55                        |
| Test_3_6_2       | -0.37    | 1.70      | 0.51                        |
| Test_3_7_2       | 0.34     | 1.57      | 0.40                        |
| Test_3_8_3       | -0.01    | 1.51      | 0.43                        |
| Test_3_9_3       | -0.10    | 1.58      | 0.47                        |
| Test_3_10_2      | 0.50     | 1.64      | 0.50                        |
| Test_3_11_2      | 1.48     | 1.37      | 0.43                        |
| Test_3_12_1      | 1.37     | 1.41      | 0.49                        |
| Test_3_13_2      | 1.89     | 1.22      | 0.32                        |
| <i>M</i> total   | 0.50     |           |                             |
| <i>SD</i> total  | 0.87     |           |                             |
| McDonald's omega | 0.83     |           |                             |
| Cronbach's alpha | 0.79     |           |                             |

**Table E.32**

*Self-depletion*

| Item label | <i>M</i> | <i>SD</i> |
|------------|----------|-----------|
| Test_4_1   | 5.15     | 1.23      |
| Test_4_5   | 4.73     | 1.48      |
| Test_4_11  | 4.09     | 1.51      |
| Test_4_15  | 4.78     | 1.25      |

**Table E.33**  
*Self-depletion*

| Item label | Item                                                                       |
|------------|----------------------------------------------------------------------------|
| Test_4_1   | The first impression I get from other people usually turns out to be true. |
| Test_4_5   | I always know why I like something.                                        |
| Test_4_11  | I am a completely rational person.                                         |
| Test_4_15  | I am very sure of my judgments.                                            |

**Table E.34**  
*Impression management*

| Item label | <i>M</i> | <i>SD</i> |
|------------|----------|-----------|
| Test_4_6   | 2.56     | 1.57      |
| Test_4_12  | 4.98     | 1.81      |
| Test_4_18  | 4.79     | 1.82      |

**Table E.35**  
*Impression management*

| Item label | Item                                                |
|------------|-----------------------------------------------------|
| Test_4_6   | I never swear.                                      |
| Test_4_12  | I always declare everything that I have to declare. |
| Test_4_18  | I never take things that do not belong to me.       |

**Table E.36**  
*Impression management (N)*

| Item label | <i>M</i> | <i>SD</i> |
|------------|----------|-----------|
| Test_4_2   | 3.62     | 1.65      |
| Test_4_4   | 4.32     | 1.73      |
| Test_4_8   | 4.75     | 1.63      |
| Test_4_10  | 3.94     | 2.08      |
| Test_4_14  | 3.19     | 1.77      |
| Test_4_16  | 3.38     | 1.85      |
| Test_4_20  | 3.90     | 2.14      |

**Table E.37**  
*Impression management (N)*

| Item label | Item                                                                        |
|------------|-----------------------------------------------------------------------------|
| Test_4_2   | Sometimes I lie when I have to.                                             |
| Test_4_4   | It has happened before that I have taken advantage of someone.              |
| Test_4_8   | Sometimes I get my own back on others rather than forgiving and forgetting. |
| Test_4_10  | I've got too much change back before and not told the clerk.                |
| Test_4_14  | Sometimes I drive faster than is allowed.                                   |
| Test_4_16  | I have done things that I don't tell others about.                          |
| Test_4_20  | I have not gone to work or school before because of an alleged illness.     |
