# Supplementary material for: Sensitivity to Injustice of Politicians and Voters
Source: Atypon-hosted journal article supplement (doi:10.1027/1864-9335/a000459), 2021-11-01
Supplement: 1864-9335_a000459_esm2.pdf [file 1864-9335_a000459_esm2.pdf]

**Electronic Supplementary Material 2a for:**  
**Sensitivity to Injustice of Politicians and Voters**

**Table B.1**

*Means, standard deviations, and correlations with confidence intervals*

| Variable                 | <i>M</i> | <i>SD</i> | 1                   | 2                      | 3                   | 4                      | 5                      | 6                   | 7                   | 8                      | 9                      | 10                    | 11                  | 12                  |
|--------------------------|----------|-----------|---------------------|------------------------|---------------------|------------------------|------------------------|---------------------|---------------------|------------------------|------------------------|-----------------------|---------------------|---------------------|
| 1 SI victim              | 1.96     | 1.12      |                     |                        |                     |                        |                        |                     |                     |                        |                        |                       |                     |                     |
| 2 SI observer            | 3.36     | 1.06      | .41**<br>[.25, .56] |                        |                     |                        |                        |                     |                     |                        |                        |                       |                     |                     |
| 3 SI beneficiary         | 2.46     | 1.04      | .31**<br>[.13, .47] | .40**<br>[.23, .55]    |                     |                        |                        |                     |                     |                        |                        |                       |                     |                     |
| 4 SI perpetrator         | 4.18     | 1.11      | -.00<br>[-.19, .18] | .25*<br>[.06, .42]     | .18<br>[-.01, .36]  |                        |                        |                     |                     |                        |                        |                       |                     |                     |
| 5 General BJW            | 1.68     | 1.04      | -.17<br>[-.35, .02] | -.37**<br>[-.52, -.19] | -.14<br>[-.32, .05] | -.30**<br>[-.46, -.11] |                        |                     |                     |                        |                        |                       |                     |                     |
| 6 BUJW                   | 2.97     | 0.79      | .05<br>[-.14, .24]  | .19<br>[-.00, .36]     | .05<br>[-.14, .24]  | .17<br>[-.03, .35]     | -.24*<br>[-.41, -.06]  |                     |                     |                        |                        |                       |                     |                     |
| 7 Immanent BJW           | 0.63     | 0.81      | .08<br>[-.11, .26]  | -.23*<br>[-.40, -.04]  | .02<br>[-.17, .21]  | -.42**<br>[-.57, -.25] | .38**<br>[.20, .53]    | .01<br>[-.18, .20]  |                     |                        |                        |                       |                     |                     |
| 8 Ultimative BJW         | 1.76     | 1.13      | -.15<br>[-.33, .03] | -.18<br>[-.35, .01]    | .10<br>[-.09, .28]  | -.13<br>[-.31, .07]    | .65**<br>[.53, .75]    | -.14<br>[-.32, .05] | .31**<br>[.13, .46] |                        |                        |                       |                     |                     |
| 9 J performance          | 0.53     | 0.67      | -.18<br>[-.37, .02] | -.27**<br>[-.45, -.08] | -.20<br>[-.39, .00] | -.00<br>[-.21, .20]    | .46**<br>[.28, .61]    | .21*<br>[.01, .40]  | .29**<br>[.09, .47] | .38**<br>[.19, .54]    |                        |                       |                     |                     |
| 10 J equality            | 0.27     | 0.86      | .22*<br>[.02, .41]  | .38**<br>[.19, .54]    | .35**<br>[.16, .52] | .12<br>[-.09, .32]     | -.49**<br>[-.63, -.31] | .17<br>[-.04, .36]  | -.12<br>[-.32, .09] | -.32**<br>[-.50, -.13] | -.29**<br>[-.47, -.09] |                       |                     |                     |
| 11 J need                | 0.71     | 0.75      | .18<br>[-.02, .37]  | .37**<br>[.18, .53]    | .20<br>[-.00, .38]  | .14<br>[-.07, .33]     | -.49**<br>[-.63, -.32] | .21*<br>[.00, .40]  | -.15<br>[-.34, .06] | -.35**<br>[-.51, -.16] | -.15<br>[-.35, .05]    | .51**<br>[.34, .65]   |                     |                     |
| 12 Self-depletion        | 4.27     | 0.71      | -.05<br>[-.25, .16] | .06<br>[-.15, .26]     | .02<br>[-.19, .22]  | -.03<br>[-.23, .19]    | .30**<br>[.09, .48]    | -.06<br>[-.27, .16] | .14<br>[-.07, .34]  | .16<br>[-.05, .36]     | .14<br>[-.08, .34]     | -.26*<br>[-.45, -.04] | -.20<br>[-.40, .01] |                     |
| 13 Impression Management | 4.33     | 0.82      | -.10<br>[-.30, .10] | .18<br>[-.02, .37]     | .26*<br>[.06, .44]  | .14<br>[-.06, .34]     | .13<br>[-.07, .33]     | -.12<br>[-.31, .09] | -.03<br>[-.23, .18] | .08<br>[-.13, .27]     | -.09<br>[-.29, .12]    | .07<br>[-.15, .28]    | .08<br>[-.13, .28]  | .45**<br>[.26, .60] |

*Note.* SI = sensitivity to injustice. BJW = belief in a just world. BUJW = belief in an unjust world. J = justice. *M* and *SD* are used to represent mean and standard deviation, respectively. Values in square brackets indicate the 95% confidence interval for each correlation. The confidence interval is a plausible range of population correlations that could have caused the sample correlation (Cumming, 2014). \* indicates  $p < .05$ . \*\* indicates  $p < .01$ .

**Electronic Supplementary Material 2b for:**  
**Sensitivity to Injustice of Politicians and Voters**

**Table B.2**

*Means, standard deviations, and correlations with confidence intervals*

| Variable                 | <i>M</i> | <i>SD</i> | 1                      | 2                      | 3                      | 4                      | 5                      | 6                      | 7                   | 8                   | 9                     | 10                  | 11                     | 12                  |
|--------------------------|----------|-----------|------------------------|------------------------|------------------------|------------------------|------------------------|------------------------|---------------------|---------------------|-----------------------|---------------------|------------------------|---------------------|
| 1 SI victim              | 2.60     | 1.25      |                        |                        |                        |                        |                        |                        |                     |                     |                       |                     |                        |                     |
| 2 SI observer            | 3.05     | 1.10      | .48**<br>[.43, .53]    |                        |                        |                        |                        |                        |                     |                     |                       |                     |                        |                     |
| 3 SI beneficiary         | 1.99     | 1.30      | .40**<br>[.34, .45]    | .47**<br>[.42, .52]    |                        |                        |                        |                        |                     |                     |                       |                     |                        |                     |
| 4 SI perpetrator         | 3.42     | 1.28      | .12**<br>[.05, .18]    | .38**<br>[.33, .43]    | .41**<br>[.35, .46]    |                        |                        |                        |                     |                     |                       |                     |                        |                     |
| 5 General BJW            | 2.29     | 1.03      | .04<br>[-.02, .10]     | -.06<br>[-.12, .00]    | .03<br>[-.03, .10]     | -.09**<br>[-.15, -.02] |                        |                        |                     |                     |                       |                     |                        |                     |
| 6 BUJW                   | 3.48     | 0.85      | .23**<br>[.17, .29]    | .38**<br>[.33, .43]    | .18**<br>[.11, .24]    | .21**<br>[.15, .27]    | -.19**<br>[-.25, -.12] |                        |                     |                     |                       |                     |                        |                     |
| 7 Immanent BJW           | 1.39     | 1.10      | .18**<br>[.12, .24]    | .05<br>[-.01, .12]     | .19**<br>[.13, .25]    | -.12**<br>[-.18, -.06] | .43**<br>[.38, .48]    | -.01<br>[-.08, .05]    |                     |                     |                       |                     |                        |                     |
| 8 Ultimative BJW         | 2.26     | 1.09      | .03<br>[-.03, .09]     | .01<br>[-.05, .08]     | .07*<br>[.01, .13]     | -.04<br>[-.10, .03]    | .69**<br>[.65, .72]    | -.12**<br>[-.18, -.06] | .43**<br>[.38, .48] |                     |                       |                     |                        |                     |
| 9 J performance          | 0.69     | 0.69      | .09**<br>[.03, .16]    | .11**<br>[.05, .17]    | .05<br>[-.02, .11]     | .07*<br>[.01, .14]     | .19**<br>[.12, .25]    | .03<br>[-.03, .09]     | .09**<br>[.03, .16] | .11**<br>[.04, .17] |                       |                     |                        |                     |
| 10 J equality            | 0.71     | 0.80      | .09**<br>[.03, .15]    | .29**<br>[.23, .35]    | .22**<br>[.15, .28]    | .24**<br>[.18, .30]    | -.00<br>[-.07, .06]    | .27**<br>[.21, .33]    | .03<br>[-.04, .09]  | .14**<br>[.07, .20] | .08*<br>[.02, .15]    |                     |                        |                     |
| 11 J need                | 0.48     | 0.85      | .14**<br>[.07, .20]    | .32**<br>[.26, .38]    | .28**<br>[.22, .34]    | .23**<br>[.16, .29]    | -.02<br>[-.08, .05]    | .24**<br>[.18, .30]    | .12**<br>[.06, .18] | .11**<br>[.05, .18] | .23**<br>[.17, .29]   | .58**<br>[.53, .62] |                        |                     |
| 12 Self-depletion        | 4.23     | 0.75      | -.20**<br>[-.26, -.14] | -.11**<br>[-.18, -.05] | -.22**<br>[-.28, -.16] | -.07*<br>[-.13, -.01]  | .06<br>[-.00, .12]     | -.00<br>[-.07, .06]    | -.04<br>[-.11, .02] | .04<br>[-.02, .11]  | .07*<br>[.01, .14]    | -.03<br>[-.10, .03] | -.10**<br>[-.17, -.04] |                     |
| 13 Impression Management | 3.91     | 0.95      | -.15**<br>[-.21, -.09] | .08*<br>[.02, .14]     | .07*<br>[.01, .14]     | .23**<br>[.16, .28]    | -.04<br>[-.11, .02]    | .02<br>[-.05, .08]     | -.04<br>[-.10, .02] | .08*<br>[.01, .14]  | -.08*<br>[-.14, -.01] | .18**<br>[.12, .25] | .11**<br>[.04, .17]    | .37**<br>[.31, .43] |

*Note.* SI = sensitivity to injustice. BJW = belief in a just world. BUJW = belief in an unjust world. J = justice. *M* and *SD* are used to represent mean and standard deviation, respectively. Values in square brackets indicate the 95% confidence interval for each correlation. The confidence interval is a plausible range of population correlations that could have caused the sample correlation (Cumming, 2014). \* indicates  $p < .05$ . \*\* indicates  $p < .01$ .
